# Supplementary material for: Development, modification, and application of low-cost and available biochar derived from corn straw for the removal of vanadium(v) from aqueous solution and real contaminated groundwater
Source: Royal Society of Chemistry journal article supplement (doi:10.1039/c8ra02172d), 2018-01-01
Supplement: c8ra02172d1.pdf [file c8ra02172d1.pdf]

**Development, modification and application of low cost and available biochar derived from corn straw for the removal of vanadium(V) from aqueous solution and real contaminated groundwater**

Ruihong Meng<sup>a,b</sup>, Tan Chen<sup>c</sup>, Yaxin Zhang<sup>d</sup>, Wenjing Lu<sup>a,b,\*</sup>, Yanting Liu<sup>a,b</sup>, Tianchu Lu<sup>e</sup>, Yanjun Liu<sup>a,b</sup>, Hongtao Wang<sup>a,b,\*</sup>

<sup>a</sup> *School of Environment, Tsinghua University, Beijing 100084, P. R. China*

<sup>b</sup> *Key Laboratory for Solid Waste Management and Environment Safety (Tsinghua University), Ministry of Education of China, Tsinghua University, Beijing 100084, P. R. China*

<sup>c</sup> *College of Life and Environmental Sciences, Minzu University of China, Beijing 100081, P. R. China*

<sup>d</sup> *College of Environmental Science and Engineering, Hunan University, Changsha 410082, P. R. China*

<sup>e</sup> *CECEP Clean Technology Development Co., Ltd, Beijing 100083, P. R. China*

\* Corresponding author at: School of Environment, Tsinghua University, Beijing 100084, China

Email addresses: [htwang@tsinghua.edu.cn](mailto:htwang@tsinghua.edu.cn) (Hongtao Wang)

[luwenjing@tsinghua.edu.cn](mailto:luwenjing@tsinghua.edu.cn) (Wenjing Lu)

## Thermo-gravimetric analysis

The TG curves of different absorbents (**Figure 1S**) showed that a continuous weight loss distributed in the range of 38–1000°C. Comparison of the TG curves showed that biochars and AC had higher residual mass (> 70%). Generally, thermal decomposition of biochar could be divided into three stages [31]. In the first stage, loss of surface water occurred at temperatures ranging from 50°C to 100°C. The second stage ranged from 100°C to 350°C, where the degradation of surface functional group occurred. In the last stage, once the temperature was higher than 350°C, the carbon skeletons started to disappear. As the temperature continued to increase from 350°C to 700°C, a smooth and steady weight loss (3.06%-8.08%) of biochars was observed (**Figure 1S**). Biochars and AC followed nearly different degradation patterns in temperatures from 700°C to 1000°C. Zr-BC, Cs-BC, BC and AC showed better thermal stability as compared to Zn-BC. Thus, comparing the residual mass, Zr-BC (89.12%), AC (87.39%), Cs-BC (82.38%) and BC (81.91%) had better protection from thermal degradation than Zn-BC (72.67%).

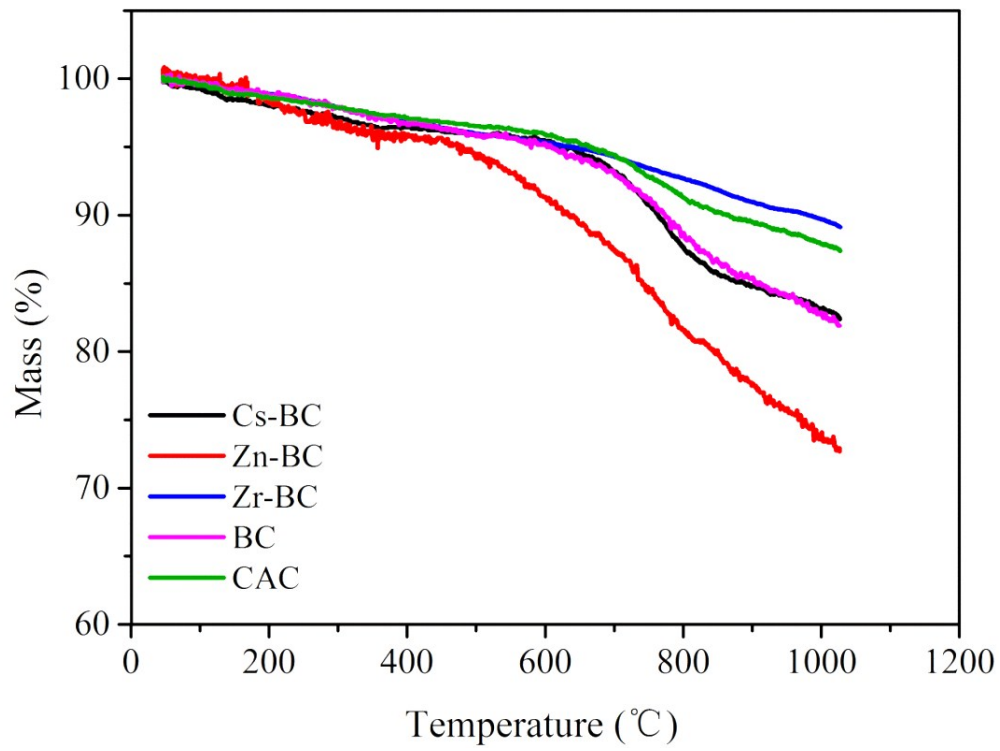

**Figure 1S.** TG curves of modified biochars, BC and AC.

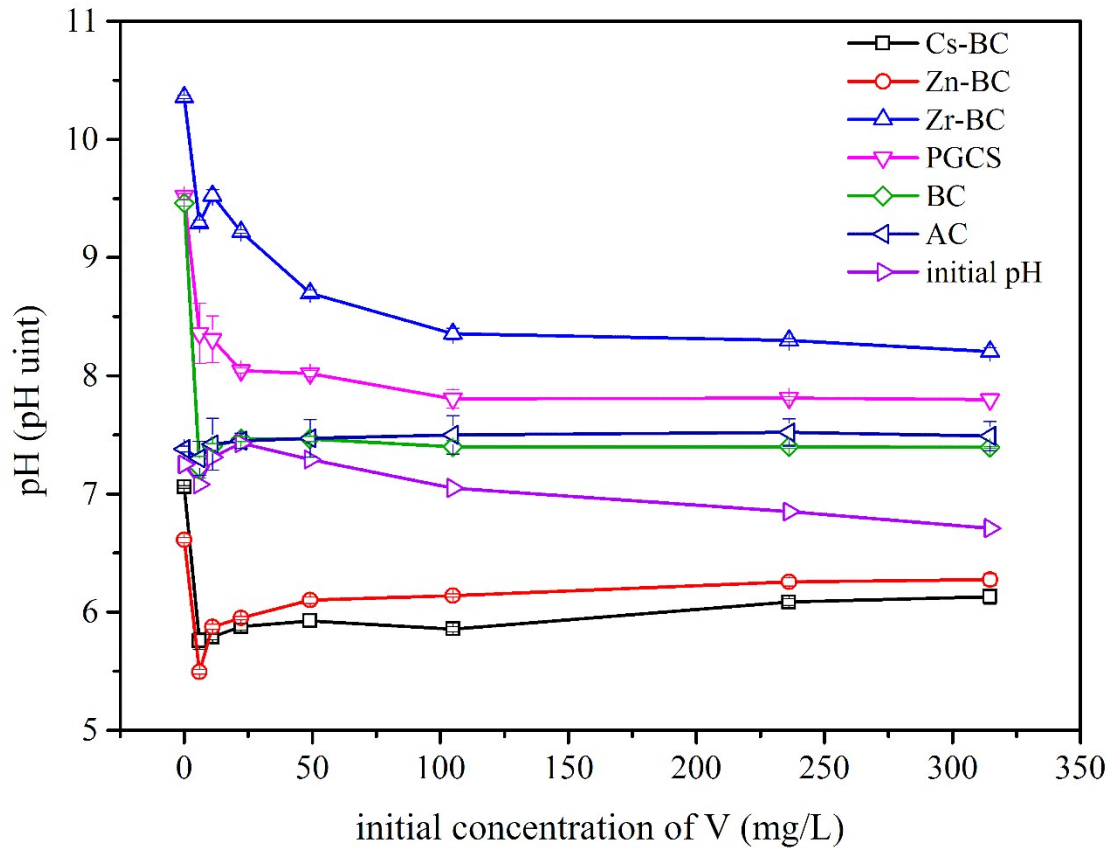

**Figure 2S.** pH of aqueous solution after vanadium(V) sorption. Equilibrium conditions: adsorbent dosage 1-8 g/L,  $25.0 \pm 1.0$  °C.

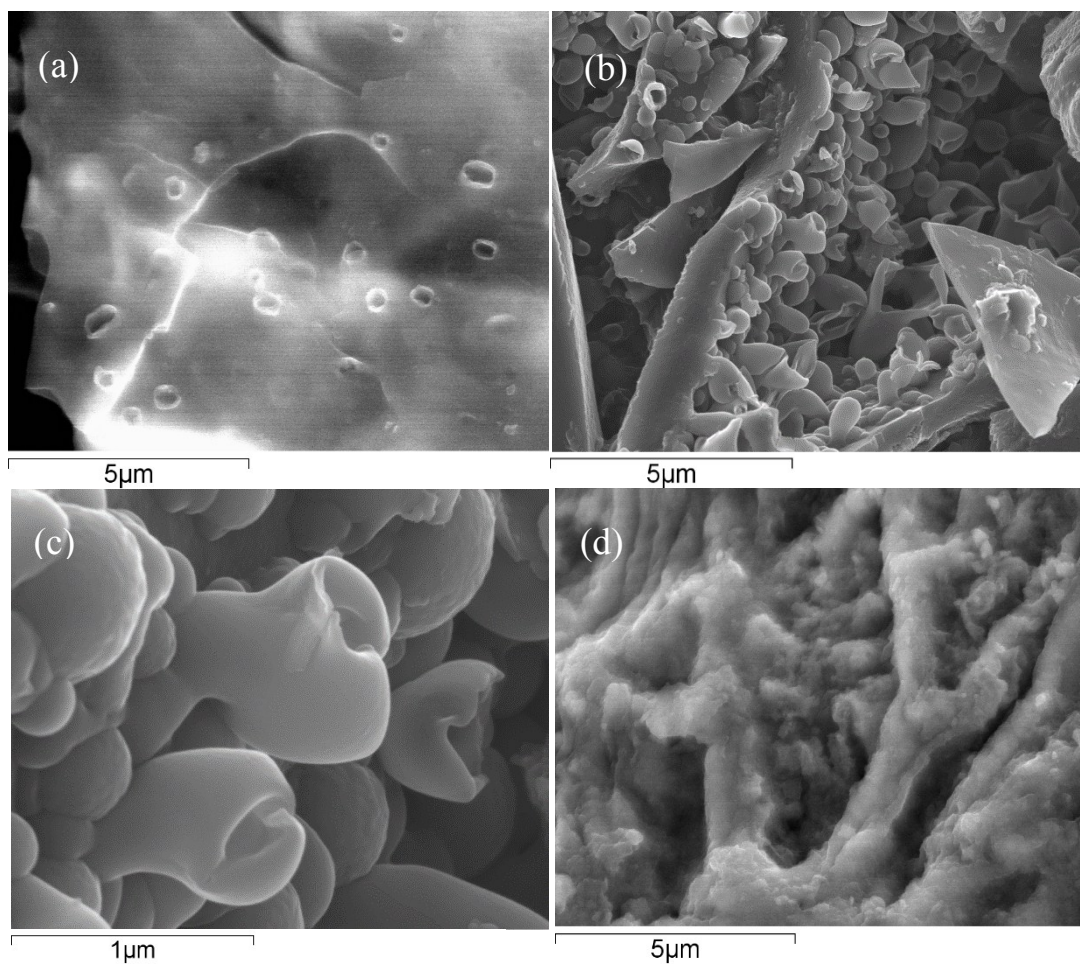

**Figure S3.** SEM images of the modified biochars: (a) Cs-BC (10000× magnification), (b) Zn-BC (10000× magnification), (c) Zn-BC (50000× magnification), (d) Zr-BC (10000× magnification).

## References

- [1]. Zhang, M., et al., Synthesis, characterization, and environmental implications of graphene-coated biochar. *Science of the Total Environment*, 2012. 435-436: p. 567-572.
